# Supplementary material for: Elite Suppressor–Derived HIV-1 Envelope Glycoproteins Exhibit Reduced Entry Efficiency and Kinetics
Source: PubMed Central journal article supplement (PMC2661022; doi:10.1371/journal.ppat.1000377), 2009-04-10
Supplement: ppat.1000377.s003.pdf [file ppat.1000377.s003.pdf]

A. Neurotropic  
Control strains

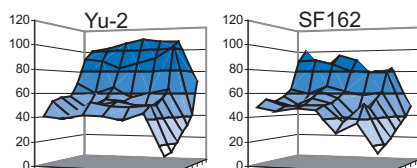

B. Patient C61

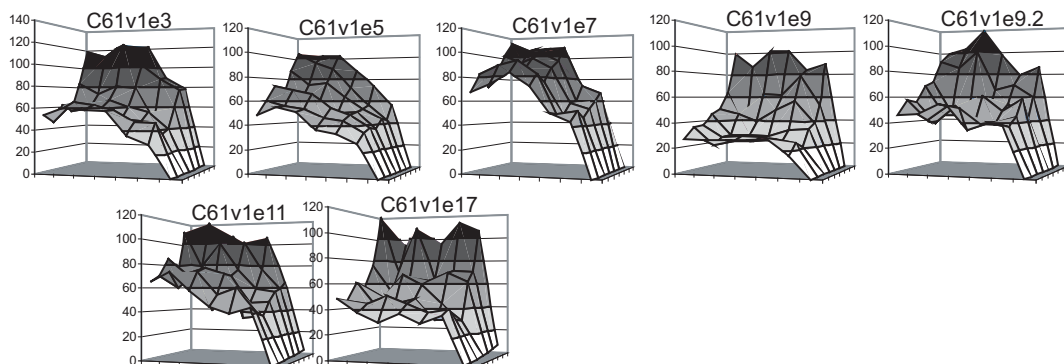

C. Patient C62

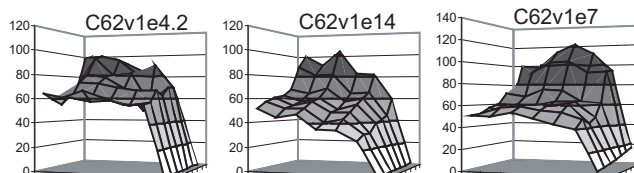

D. Patient C93

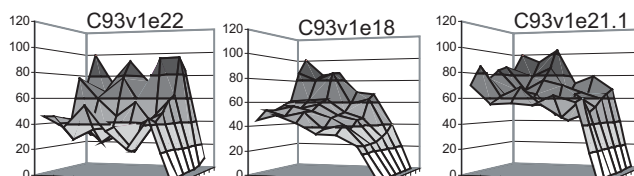

E. Patient C94

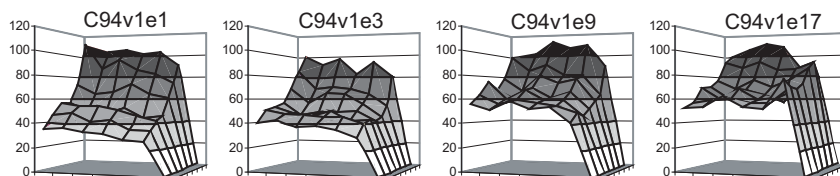

F. Patient C96

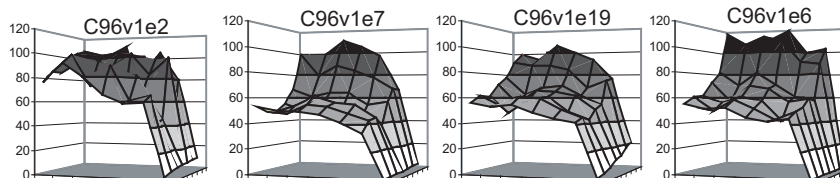

G. Patient C98

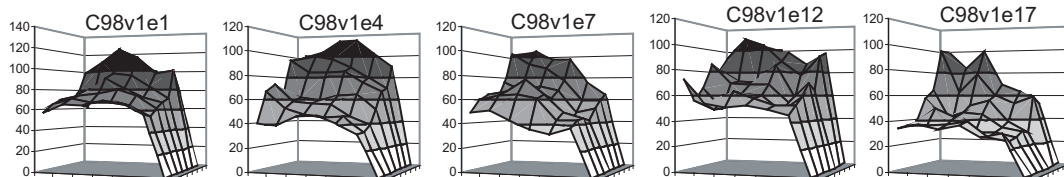

H. Patient C109

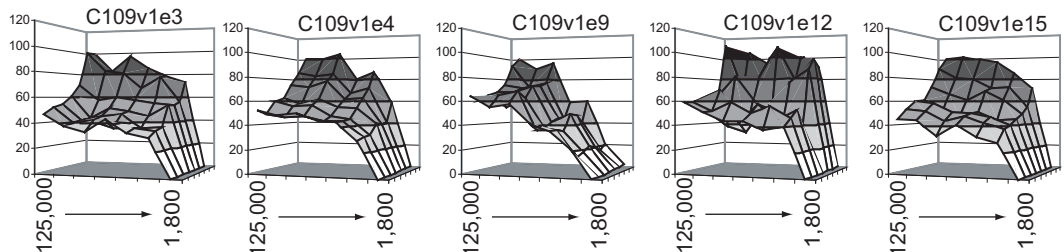

Approximate CD4 molecules/cell

I. Patient ES2

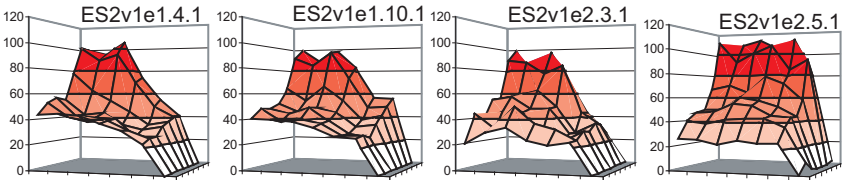

J. Patient ES3

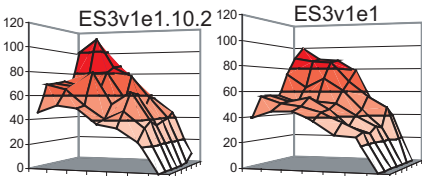

K. Patient ES4

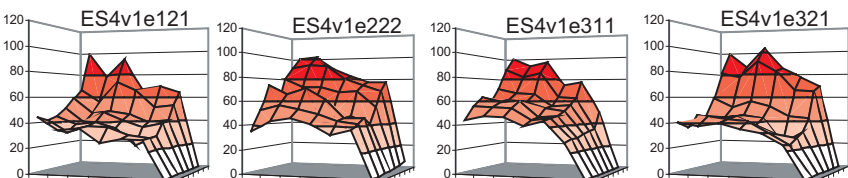

L. Patient ES7

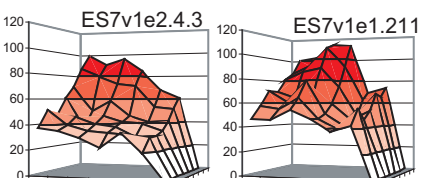

M. Patient ES8

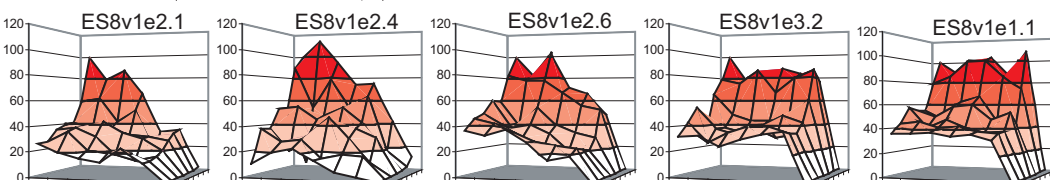

Relative infectivity (% max CD4/CCR5)

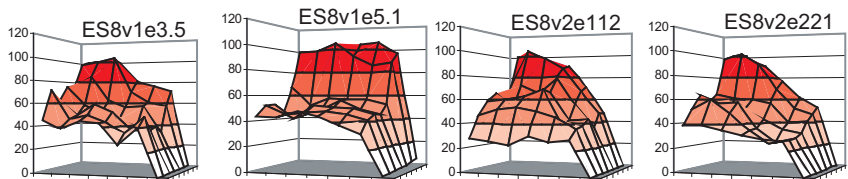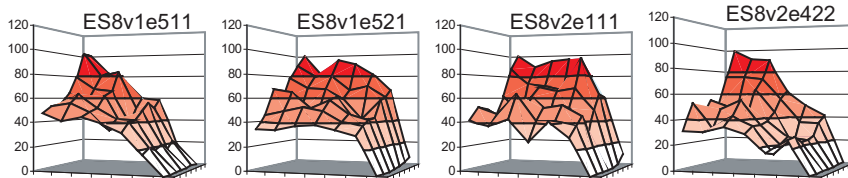

N. Patient ES9

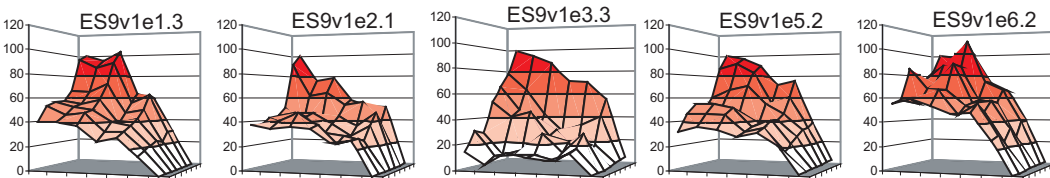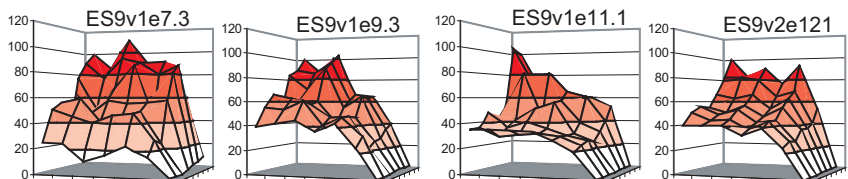

O. Patient ES10

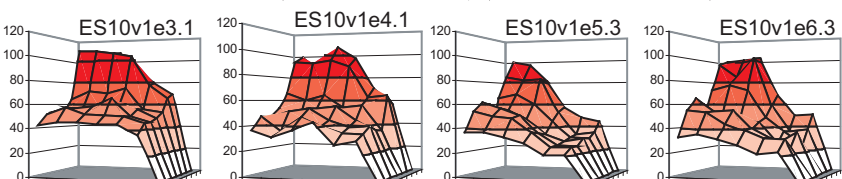

Approximate CD4 molecules/cell

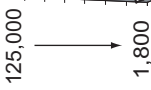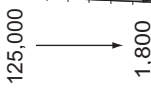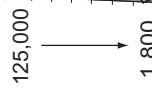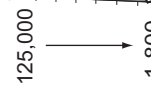

**Supplementary Figure 3 Full surface plots for chronic progressor (CP) and elite suppressor (ES) envelopes. (A-O)** Surface plots are arranged by patient, including Yu-2 and SF-162 control strains, indicated in blue. CP envs are indicated in grayscale, and ES envs are indicated in red.
